# Supplementary material for: Feature Signature Discovery for Autism Detection: An Automated Machine Learning Based Feature Ranking Framework
Source: Hindawi journal article supplement (doi:10.1155/2023/6330002), 2023-01-01
Supplement: f1 [file 6330002.f1.zip]

| Class "NO"  | Class "YES" |
|-------------|-------------|
| 0.999071107 | 3.00E-14    |
| 0.99906731  | 0.082986713 |
| 0.9990806   | 2.05E-06    |
| 0.999991682 | 0.082682831 |
| 0.999087574 | 0.082363468 |
| 0.9990863   | 1.68E-10    |
| 0.9999999   | 3.00E-14    |
| 0.9999999   | 3.00E-14    |
| 0.9999999   | 1.63E-10    |
| 0.99909195  | 2.01E-06    |
| 0.9999999   | 2.02E-06    |
| 0.999090275 | 2.03E-06    |
| 0.908334748 | 2.04E-06    |
| 0.908652359 | 3.00E-14    |
| 0.999096017 | 3.00E-14    |
| 0.9999999   | 0.08387111  |
| 0.999991757 | 3.00E-14    |
| 0.999070998 | 2.04E-06    |
| 0.999075938 | 2.03E-06    |
| 0.9999999   | 0.082355233 |
| 0.9999999   | 0.082918616 |
| 0.9999999   | 1.70E-10    |
| 0.908942861 | 1.67E-10    |
| 0.9999999   | 2.02E-06    |
| 0.999991671 | 0.083130327 |
| 0.9999999   | 1.68E-10    |
| 0.999094861 | 1.66E-10    |
| 0.999991684 | 1.67E-10    |
| 0.9999999   | 0.082987705 |
| 0.99999167  | 2.04E-06    |
| 0.908907229 | 0.083218217 |
| 0.907514976 | 1.70E-10    |
| 0.999092995 | 1.68E-10    |
| 0.9999999   | 1.70E-10    |
| 0.9999999   | 2.04E-06    |
| 0.9999999   | 1.68E-10    |
| 0.908606555 | 0.082780978 |
| 0.999088218 | 3.00E-14    |
| 0.9999999   | 1.69E-10    |
| 0.9999999   | 2.16E-06    |
| 0.999991613 | 2.06E-06    |
| 0.999095719 | 2.12E-06    |
| 0.999093401 | 3.00E-14    |
| 0.999991656 | 0.083783367 |
| 0.908363648 | 1.94E-06    |
| 0.999991649 | 2.02E-06    |

|             |             |
|-------------|-------------|
| 0.908312066 | 2.02E-06    |
| 0.9999999   | 0.083284526 |
| 0.999088041 | 1.99E-06    |
| 0.909132162 | 2.05E-06    |
| 0.999088571 | 0.080271262 |
| 0.999087407 | 0.08298038  |
| 0.9999999   | 1.66E-10    |
| 0.910692802 | 3.00E-14    |
| 0.9999999   | 1.68E-10    |
| 0.99908805  | 0.083926636 |
| 0.999991774 | 3.00E-14    |
| 0.9999999   | 2.02E-06    |
| 0.999991664 | 2.06E-06    |
| 0.9999999   | 0.083077177 |
| 0.9999999   | 0.084571977 |
| 0.908054348 | 0.083297464 |
| 0.907113745 | 1.68E-10    |
| 0.908866132 | 1.67E-10    |
| 0.999991676 | 0.082360713 |
| 0.999087717 | 3.00E-14    |
| 0.999087883 | 2.02E-06    |
| 0.907955392 | 0.083134472 |
| 0.999991666 | 0.083510041 |
| 0.909603594 | 1.68E-10    |
| 0.999084683 | 1.68E-10    |
| 0.999088063 | 0.083398968 |
| 0.9999999   | 0.082262986 |
| 0.908378144 | 1.68E-10    |
| 0.908879005 | 2.00E-06    |
| 0.908541918 | 1.69E-10    |
| 0.999090316 | 1.98E-06    |
| 0.90876187  | 0.082472297 |
| 0.9999999   | 3.00E-14    |
| 0.90896843  | 0.08281254  |
| 0.908106016 | 0.08206933  |
| 0.9999999   | 0.082906805 |
| 0.999991751 | 2.04E-06    |
| 0.999099221 | 2.00E-06    |
| 0.99999175  | 1.67E-10    |
| 0.999083007 | 3.00E-14    |
| 0.999991739 | 3.00E-14    |
| 0.999095031 | 0.084571977 |
| 0.999087883 | 2.03E-06    |
| 0.99999171  | 2.02E-06    |
| 0.999991603 | 0.082832653 |
| 0.999991743 | 2.00E-06    |
| 0.999991691 | 3.00E-14    |

|             |             |
|-------------|-------------|
| 0.999092599 | 1.66E-10    |
| 0.908401008 | 0.082549908 |
| 0.908750935 | 0.083043418 |
| 0.909460881 | 0.081821417 |
| 0.999080066 | 2.05E-06    |
| 0.9999999   | 0.082824863 |
| 0.999991649 | 1.69E-10    |
| 0.999991404 | 2.03E-06    |
| 0.99999171  | 0.082987816 |
| 0.999088571 | 2.02E-06    |
| 0.9999999   | 2.02E-06    |
| 0.908913518 | 1.69E-10    |
| 0.908465806 | 0.082987705 |
| 0.999088041 | 3.00E-14    |
| 0.908907229 | 2.14E-06    |
| 0.90894933  | 1.68E-10    |
| 0.9999999   | 3.00E-14    |
| 0.9999999   | 2.04E-06    |
| 0.999991625 | 0.082045875 |
| 0.999991723 | 1.98E-06    |
| 0.999991605 | 3.00E-14    |
| 0.999091158 | 0.082618805 |
| 0.999084372 | 2.04E-06    |
| 0.909320048 | 2.04E-06    |
| 0.999087046 | 0.083690597 |
| 0.99907547  | 2.04E-06    |
| 0.999086376 | 1.68E-10    |
| 0.909267958 | 0.080847695 |
| 0.909056165 | 2.06E-06    |
| 0.9999999   | 0.082772283 |
| 0.9999999   | 2.04E-06    |
| 0.907686939 | 3.00E-14    |
| 0.908504124 | 2.04E-06    |
| 0.999991498 | 3.00E-14    |
| 0.9999999   | 2.05E-06    |
| 0.9999999   | 2.03E-06    |
| 0.903488552 | 1.72E-10    |
| 0.999087216 | 0.082824863 |
| 0.999082764 | 0.083006013 |
| 0.999991651 | 1.65E-10    |
| 0.99999166  | 1.68E-10    |
| 0.909144886 | 0.082621469 |
| 0.999074269 | 1.67E-10    |
| 0.909538061 | 2.02E-06    |
| 0.999083753 | 1.68E-10    |
| 0.999991808 | 3.00E-14    |
| 0.9999999   | 0.083743735 |

|             |          |
|-------------|----------|
| 0.9999999   | 1.66E-10 |
| 0.999991736 |          |
| 0.910234745 |          |
| 0.999991614 |          |
| 0.9999999   |          |
| 0.908817798 |          |
| 0.908728582 |          |
| 0.999991742 |          |
| 0.910924852 |          |
| 0.999991613 |          |
| 0.9999999   |          |
