# Supplementary material for: Feature Signature Discovery for Autism Detection: An Automated Machine Learning Based Feature Ranking Framework
Source: Hindawi journal article supplement (doi:10.1155/2023/6330002), 2023-01-01
Supplement: f1 [file 6330002.f1.zip]

| Class "No"  | Class "Yes" |
|-------------|-------------|
| 0.99099426  | 0.58115242  |
| 0.999965845 | 2.45E-09    |
| 0.9999999   | 5.19E-09    |
| 0.9999999   | 9.43E-06    |
| 0.989964018 | 1.94E-08    |
| 0.9999999   | 0.003131339 |
| 0.999999777 | 2.21E-08    |
| 0.9999999   | 2.90E-07    |
| 0.9999999   | 3.36E-07    |
| 0.9999999   | 2.73E-08    |
| 0.999999777 | 2.84E-07    |
| 0.9999999   | 3.07E-08    |
| 0.9999999   | 2.37E-08    |
| 0.9999999   | 3.56E-07    |
| 0.999999771 | 2.45E-09    |
| 0.9999999   | 2.59E-08    |
| 0.99992079  | 2.44E-09    |
| 0.999966305 | 4.36E-07    |
| 0.9999999   | 2.45E-09    |
| 0.9999999   | 2.44E-09    |
| 0.99992079  | 0.047382811 |
| 0.9999999   | 1.04E-08    |
| 0.9999999   | 0.003676582 |
| 0.9999999   | 5.39E-09    |
| 0.577570354 | 0.564094237 |
| 0.999904334 | 2.37E-08    |
| 0.990274371 | 3.84E-07    |
| 0.9999999   | 3.33E-07    |
| 0.9999999   | 2.45E-09    |
| 0.578228881 | 0.033628849 |
| 0.999929609 | 2.85E-08    |
| 0.9999999   | 2.71E-08    |
| 0.991432185 | 1.06E-08    |
| 0.9999999   | 0.00294843  |
| 0.99990392  | 0.003695051 |
| 0.987359197 | 2.45E-09    |
| 0.9999999   | 6.02E-08    |
| 0.99991904  | 0.040642261 |
| 0.991474758 | 2.48E-08    |
| 0.9999999   | 0.564214221 |
| 0.9999999   | 0.043173859 |
| 0.990808137 | 0.018946295 |
| 0.999953437 | 0.051194861 |
| 0.999916079 | 2.45E-09    |
| 0.9999999   | 3.80E-07    |
| 0.990629365 | 0.045375252 |

|             |             |
|-------------|-------------|
| 0.999961919 | 3.11E-07    |
| 0.577477291 | 2.82E-08    |
| 0.99992079  | 0.50603046  |
| 0.98665399  | 2.18E-09    |
| 0.577849248 | 0.030367844 |
| 0.99991904  | 1.04E-08    |
| 0.988410536 | 1.49E-05    |
| 0.999965845 | 4.03E-07    |
| 0.999999777 | 3.67E-07    |
| 0.542089276 | 0.040444712 |
| 0.99991904  | 2.45E-09    |
| 0.987359197 | 2.44E-09    |
| 0.987359197 | 0.018485673 |
| 0.9917672   | 2.45E-09    |
| 0.986664299 | 2.76E-07    |
| 0.56343216  | 0.028476459 |
| 0.99996797  | 2.45E-09    |
| 0.518954694 | 5.46E-08    |
| 0.577927324 | 0.485214739 |
| 0.98700311  | 3.55E-09    |
| 0.585059469 | 3.58E-09    |
| 0.990986374 | 5.39E-09    |
| 0.999918185 | 1.10E-05    |
| 0.460037399 | 2.14E-08    |
| 0.999961919 | 1.02E-08    |
| 0.531241791 | 3.66E-07    |
| 0.990890752 | 5.25E-09    |
| 0.986633111 | 6.04E-08    |
| 0.9999999   | 0.033858448 |
| 0.999966305 | 1.51E-05    |
| 0.9999999   | 0.487556745 |
| 0.562990382 | 5.34E-09    |
| 0.989784306 | 0.563810098 |
| 0.977851837 | 2.73E-08    |
| 0.601386879 | 1.10E-06    |
| 0.9999999   | 0.03294935  |
| 0.577724761 | 5.29E-09    |
| 0.57806149  | 3.57E-09    |
| 0.99991904  | 5.82E-08    |
| 0.585059469 | 2.29E-08    |
| 0.57738511  | 0.563825632 |
| 0.999953379 | 0.002722186 |
| 0.999999771 | 2.31E-08    |
| 0.9999999   | 2.24E-07    |
| 0.9999999   | 2.44E-09    |
| 0.623175508 | 5.39E-09    |
| 0.99992079  | 2.73E-07    |

|             |             |
|-------------|-------------|
| 0.990890752 | 2.45E-08    |
| 0.999970358 | 3.53E-07    |
| 0.9999999   | 2.44E-09    |
| 0.9999999   | 5.29E-09    |
| 0.99992079  | 0.572784179 |
| 0.9999999   | 1.79E-05    |
| 0.9999999   | 0.045261044 |
| 0.991474758 | 5.34E-09    |
| 0.999963544 | 2.45E-09    |
| 0.9999999   | 0.025141564 |
| 0.999964325 | 0.002595099 |
| 0.992050387 | 2.54E-07    |
| 0.990858226 | 2.44E-09    |
| 0.9999999   | 5.84E-08    |
| 0.98700311  | 2.51E-08    |
| 0.9999999   | 2.75E-07    |
| 0.999942653 | 1.04E-08    |
| 0.9999999   | 1.35E-05    |
| 0.42744627  | 9.97E-09    |
| 0.444283241 | 2.45E-09    |
| 0.999966953 | 5.13E-09    |
| 0.988409928 | 0.05126228  |
| 0.992519577 | 3.93E-07    |
| 0.539059704 | 5.40E-09    |
| 0.9999999   | 5.33E-09    |
| 0.9999999   | 2.58E-08    |
| 0.993282404 | 3.20E-07    |
| 0.988666638 | 3.17E-07    |
| 0.999941847 | 2.44E-09    |
| 0.986179792 | 0.002795253 |
| 0.98814978  | 1.26E-05    |
| 0.999968958 | 0.004040801 |
| 0.56343216  | 0.029780737 |
| 0.563748154 | 0.00390491  |
| 0.991604007 | 2.25E-08    |
| 0.9999999   | 2.18E-07    |
| 0.999963544 | 2.45E-09    |
| 0.999963779 | 2.44E-09    |
| 0.563733773 | 6.70E-08    |
| 0.47573588  | 5.21E-09    |
| 0.999959965 | 2.29E-08    |
| 0.988487761 | 0.044560741 |
| 0.986992174 | 0.040257591 |
| 0.988194104 | 3.40E-07    |
| 0.9999999   | 0.003952082 |
| 0.988935196 | 5.05E-09    |
| 0.999926344 | 5.24E-09    |

|             |             |
|-------------|-------------|
| 0.988487761 | 2.21E-08    |
| 0.999964324 | 2.17E-08    |
| 0.9999999   | 5.25E-09    |
| 0.989273236 | 2.77E-08    |
| 0.991616212 | 0.031026268 |
| 0.999926344 | 2.18E-09    |
| 0.592445434 | 0.002786373 |
| 0.981102613 | 1.10E-05    |
| 0.991432185 | 1.78E-05    |
| 0.9999999   | 2.18E-09    |
| 0.999966953 | 1.08E-06    |
| 0.999949184 | 3.11E-07    |
| 0.588762085 | 2.56E-07    |
| 0.56682663  | 0.025742695 |
| 0.568794394 | 0.003482626 |
| 0.593710072 | 2.45E-09    |
| 0.990986374 | 2.45E-09    |
| 0.999966471 | 0.049370307 |
| 0.989019531 | 0.002733793 |
| 0.587652511 | 2.22E-08    |
| 0.9999999   | 1.46E-05    |
| 0.580392186 | 1.21E-06    |
| 0.9999999   | 3.02E-07    |
| 0.99992079  | 0.045552207 |
| 0.988445866 | 2.18E-09    |
| 0.9999999   | 5.34E-09    |
| 0.999949184 | 1.72E-07    |
| 0.999965845 | 2.44E-09    |
| 0.999943912 | 7.84E-07    |
| 0.565036951 | 0.002538614 |
| 0.999941847 | 1.18E-05    |
| 0.98668069  | 0.042864729 |
| 0.9999999   | 3.91E-07    |
| 0.987418402 | 5.29E-09    |
| 0.602811794 | 3.22E-07    |
| 0.99996574  | 2.39E-08    |
| 0.9999999   | 0.035320608 |
| 0.986547066 | 0.003796459 |
| 0.531047377 | 3.80E-07    |
| 0.986724672 | 5.35E-09    |
| 0.999949556 | 5.10E-09    |
| 0.999926344 | 5.08E-09    |
| 0.52256488  | 3.90E-07    |
| 0.999966471 | 0.00294843  |
| 0.999924363 | 1.46E-05    |
| 0.9999999   | 1.69E-05    |
| 0.9999999   | 0.541742226 |

|             |             |
|-------------|-------------|
| 0.576275887 | 3.49E-07    |
| 0.990791326 | 0.050774893 |
| 0.999963779 | 0.640784919 |
| 0.999999771 | 5.05E-09    |
| 0.586920585 | 0.609639445 |
| 0.999965034 | 1.93E-07    |
| 0.99996469  | 0.022954389 |
| 0.651844008 | 0.564214221 |
| 0.992642502 | 3.59E-09    |
| 0.9999999   | 0.02314945  |
| 0.999966953 | 0.564375483 |
| 0.572134085 | 6.29E-08    |
| 0.577570354 | 5.33E-09    |
| 0.529377477 | 2.44E-08    |
| 0.999953437 | 3.56E-09    |
| 0.9999999   | 2.64E-08    |
| 0.992699536 | 2.64E-08    |
| 0.99995818  | 0.563042304 |
| 0.999918185 | 1.04E-08    |
| 0.999918314 | 2.44E-09    |
| 0.99996797  | 0.03778811  |
| 0.9999999   | 1.09E-06    |
| 0.987414549 | 0.044425585 |
| 0.99995818  | 0.002862367 |
| 0.987887411 | 1.04E-08    |
| 0.989807928 | 1.33E-05    |
| 0.9999999   | 0.002869121 |
| 0.9999999   | 3.42E-07    |
| 0.988487761 | 0.004362193 |
| 0.448397724 | 0.569358825 |
| 0.9999999   | 5.16E-09    |
| 0.577775547 | 3.57E-09    |
| 0.563318634 | 0.030160115 |
| 0.999999777 | 0.042918258 |
| 0.999999771 | 0.028785723 |
| 0.999942889 | 1.20E-06    |
| 0.999965034 | 4.00E-07    |
| 0.990764602 | 4.60E-07    |
| 0.999926344 | 1.04E-08    |
| 0.599070449 | 1.04E-06    |
| 0.558365089 | 1.64E-05    |
| 0.617760327 | 4.07E-07    |
| 0.990890752 | 2.18E-09    |
| 0.999944577 | 1.20E-06    |
| 0.990194421 | 6.62E-08    |
| 0.999916659 | 2.82E-08    |
| 0.9999999   | 0.051652832 |

|             |             |
|-------------|-------------|
| 0.99995818  | 3.23E-07    |
| 0.990764602 | 2.87E-08    |
| 0.989787241 | 2.51E-08    |
| 0.980625384 | 0.045467511 |
| 0.574424372 | 5.24E-09    |
| 0.992699536 | 1.42E-05    |
| 0.999970358 | 6.61E-08    |
| 0.590309833 | 1.73E-05    |
| 0.992108885 | 5.17E-09    |
| 0.9999999   | 3.63E-09    |
| 0.999942653 | 0.563067298 |
| 0.988445866 | 2.44E-09    |
| 0.999966953 | 7.21E-08    |
| 0.563806294 | 0.003248737 |
| 0.982702616 | 5.23E-09    |
| 0.9999999   | 2.79E-08    |
| 0.9999999   | 2.86E-08    |
| 0.988589252 | 4.50E-07    |
| 0.99991904  | 2.45E-09    |
| 0.989719331 | 1.40E-05    |
| 0.99996574  | 2.15E-08    |
| 0.99995795  | 2.45E-09    |
| 0.9999999   | 4.99E-09    |
| 0.990791326 | 0.03412248  |
| 0.9999999   | 4.90E-07    |
| 0.989397498 | 2.44E-09    |
|             | 0.5         |
|             | 2.20E-08    |
|             | 1.95E-08    |
|             | 0.029439508 |
|             | 0.044538144 |
|             | 1.76E-05    |
|             | 2.73E-08    |
|             | 0.040674918 |
|             | 2.44E-09    |
|             | 2.44E-09    |
|             | 1.09E-08    |
|             | 0.563825632 |
|             | 0.002567722 |
|             | 2.27E-08    |
|             | 2.39E-08    |
|             | 2.45E-09    |
|             | 1.33E-05    |
|             | 4.97E-09    |
|             | 2.62E-08    |
|             | 5.12E-09    |
|             | 6.99E-08    |

0.034212744  
2.18E-09  
3.54E-07  
4.01E-07  
0.031026268  
2.45E-09  
1.41E-05  
0.027689013  
1.88E-05  
0.030986292  
1.06E-08  
1.04E-06  
1.09E-08  
2.44E-09  
1.50E-05  
3.17E-07  
0.003824257  
2.45E-09  
2.90E-08  
0.045364982  
6.57E-08  
1.35E-05  
2.71E-08  
1.51E-05  
2.45E-09  
1.06E-08  
0.040660496  
1.88E-05  
2.64E-08  
1.09E-06  
3.61E-07  
0.028848091  
0.00409055  
2.44E-08  
5.25E-09  
1.51E-05  
2.45E-09  
2.44E-09  
2.18E-09  
2.44E-09  
0.461149835  
0.461149835  
2.18E-09  
8.25E-07  
0.383392072  
1.99E-08  
0.003935897

5.13E-09  
2.85E-08  
5.16E-09  
3.58E-09  
2.44E-09  
2.71E-08  
2.44E-09  
2.18E-09  
3.23E-07  
2.44E-09  
0.651844008  
0.049326796  
2.45E-09  
0.029364979  
0.529221711  
3.18E-07  
3.04E-07  
0.433042277  
1.51E-05  
2.44E-09  
0.047609886  
0.55560411  
3.25E-07  
2.90E-07  
8.91E-07  
0.002800738  
1.04E-08  
2.18E-09  
3.40E-07  
6.25E-08  
5.39E-09  
1.80E-05  
2.38E-08  
2.37E-08  
5.25E-09  
2.44E-08  
0.052338469  
1.49E-05  
3.63E-09  
2.55E-08  
6.98E-08  
8.93E-07  
0.003852419  
5.12E-09  
2.45E-09  
7.53E-08  
5.14E-09



2.59E-08  
1.76E-05  
3.55E-09  
2.96E-07  
5.31E-09  
1.08E-06  
3.90E-07  
6.11E-08  
0.038983953  
6.65E-08  
4.16E-07  
1.04E-08  
2.44E-09  
0.035498826  
2.41E-08  
1.88E-07  
2.18E-09  
1.02E-08  
3.93E-07  
5.97E-08  
2.15E-08  
0.027215186  
2.44E-09  
7.25E-08  
1.70E-05  
2.63E-08  
5.21E-09  
3.90E-07  
2.48E-08  
5.22E-09  
1.88E-05  
0.048158639  
1.06E-08  
2.29E-08  
2.93E-08  
2.45E-09  
1.04E-08  
2.51E-07  
2.44E-09  
1.70E-05  
1.49E-05  
5.22E-09  
2.65E-08  
2.44E-09  
5.22E-09  
0.638366223  
2.03E-08

0.461322107  
5.34E-09  
1.70E-05  
2.45E-09  
2.60E-08  
0.004031549  
0.002602467  
2.39E-08  
5.39E-09  
2.73E-08  
1.32E-05  
2.45E-09  
5.22E-09  
4.02E-07  
0.004085373  
1.10E-06  
5.34E-09  
2.96E-07  
2.96E-07  
3.20E-07  
1.08E-08  
2.49E-08  
2.45E-09  
1.65E-05  
7.21E-08  
0.00283459  
0.023346556  
2.44E-09  
0.05114064  
2.45E-09  
2.45E-09  
4.16E-07  
1.49E-05  
0.022954389  
2.44E-09  
0.019860749  
1.08E-08  
0.054275913  
0.037345533  
2.91E-07  
2.16E-08  
0.033897044  
0.002621316  
3.33E-07  
2.44E-09  
2.18E-09  
2.45E-09

3.58E-09  
5.04E-09  
9.65E-07  
2.44E-08  
2.45E-09  
2.60E-07  
6.34E-08  
2.45E-09  
6.74E-08  
0.032789871  
3.11E-07  
2.44E-09  
0.028655743  
5.90E-08  
2.36E-08  
0.002555773  
2.18E-09  
0.041711918  
1.09E-05  
2.44E-09  
0.004014587  
2.18E-09  
0.039629586  
2.00E-08  
2.45E-09  
3.57E-09  
1.05E-08  
1.46E-05  
1.08E-08  
2.59E-07  
2.45E-09  
0.003901697  
2.45E-09  
0.003422402  
0.004372277  
2.37E-08  
1.07E-08  
9.92E-09  
5.87E-08  
5.33E-07  
3.11E-07  
0.036502443  
0.0515171  
1.04E-08  
0.516183863  
0.5  
3.54E-09

0.563799534  
2.62E-07  
5.31E-09  
5.29E-09  
0.033527382  
2.44E-09  
0.003579475  
5.14E-09  
0.033727437  
4.07E-07  
4.10E-07  
2.74E-08  
6.22E-08  
2.99E-07  
6.62E-08  
0.520942616  
0.576275887  
3.57E-07  
0.038543085  
0.00339572  
0.563522962  
2.80E-08  
3.18E-07  
0.004071753  
5.23E-09  
2.18E-09  
2.78E-07  
5.21E-09  
0.564094237  
5.36E-09  
2.45E-08  
2.77E-08  
0.591897297  
2.18E-09  
3.25E-07  
0.034748113  
0.004127194  
0.03731594  
1.33E-05  
1.04E-08  
1.28E-05  
1.28E-05  
2.44E-09  
2.45E-09  
0.027928955  
0.002521775  
1.20E-06

2.49E-08  
0.440799813  
0.002638697  
1.51E-05  
2.74E-08  
1.10E-06  
1.28E-05  
0.004105094  
4.02E-07  
0.030736697  
0.044718328  
2.04E-08  
2.18E-09  
2.44E-09  
2.44E-09  
0.002756834  
0.00360357  
5.40E-09  
1.90E-07
