# Supplementary material for: Feature Signature Discovery for Autism Detection: An Automated Machine Learning Based Feature Ranking Framework
Source: Hindawi journal article supplement (doi:10.1155/2023/6330002), 2023-01-01
Supplement: f1 [file 6330002.f1.zip]

| Sample | X            | Y            | Label |
|--------|--------------|--------------|-------|
| 1      | 0.967317345  | -0.00683555  | No    |
| 3      | 0.643896329  | -0.491563311 | Yes   |
| 4      | -1.426282315 | 0.05832638   | Yes   |
| 5      | -1.110710939 | -0.421519617 | Yes   |
| 8      | -0.073513606 | -0.28944967  | Yes   |
| 9      | 1.246772172  | -0.050379165 | No    |
| 10     | -0.758850659 | -0.206793486 | Yes   |
| 11     | -0.167567243 | -0.070915939 | Yes   |
| 12     | -0.692509064 | -0.173286342 | Yes   |
| 13     | 1.561786287  | 0.131371616  | No    |
| 14     | -0.428837543 | -0.01108395  | Yes   |
| 16     | -0.335363915 | -0.405864608 | Yes   |
| 17     | 1.561786287  | 0.131371616  | No    |
| 18     | -0.696722692 | -0.500077441 | Yes   |
| 19     | 0.881734103  | -0.233276597 | No    |
| 20     | -0.335363915 | -0.405864608 | Yes   |
| 21     | -0.803653238 | 0.092707224  | Yes   |
| 22     | -0.839769787 | 0.529009606  | Yes   |
| 23     | -0.447579331 | 0.634224455  | Yes   |
| 25     | -1.426282315 | 0.05832638   | Yes   |
| 26     | 1.561786287  | 0.131371616  | No    |
| 27     | -0.733568856 | -0.533052791 | Yes   |
| 28     | -1.426282315 | 0.05832638   | Yes   |
| 29     | -0.434444822 | 1.151493815  | Yes   |
| 30     | 1.561786287  | 0.131371616  | No    |
| 31     | 1.561786287  | 0.131371616  | No    |
| 32     | 1.561786287  | 0.131371616  | No    |
| 33     | 1.561786287  | 0.131371616  | No    |
| 34     | 1.561786287  | 0.131371616  | No    |
| 36     | -1.426282315 | 0.05832638   | Yes   |
| 37     | 1.561786287  | 0.131371616  | No    |
| 39     | 1.561786287  | 0.131371616  | No    |
| 41     | 1.561786287  | 0.131371616  | No    |
| 42     | 1.561786287  | 0.131371616  | No    |
| 43     | 1.561786287  | 0.131371616  | No    |
| 45     | 1.561786287  | 0.131371616  | No    |
| 46     | 1.246772172  | -0.050379165 | No    |
| 48     | 1.561786287  | 0.131371616  | No    |
| 49     | 1.561786287  | 0.131371616  | No    |
| 51     | 1.561786287  | 0.131371616  | No    |
| 53     | 1.561786287  | 0.131371616  | No    |
| 54     | -1.426282315 | 0.05832638   | Yes   |
| 55     | 1.561786287  | 0.131371616  | No    |
| 57     | 0.184850298  | -0.517786586 | Yes   |
| 61     | 1.561786287  | 0.131371616  | No    |
| 63     | -0.758293398 | -0.868390264 | Yes   |

|     |              |              |     |
|-----|--------------|--------------|-----|
| 64  | -0.139206688 | 0.902204193  | Yes |
| 65  | 0.516655288  | 1.169621434  | No  |
| 66  | -1.146827488 | 0.014782764  | Yes |
| 67  | 0.610686177  | 0.113243998  | Yes |
| 68  | 1.28233146   | 0.174915231  | No  |
| 69  | 0.922793896  | 0.126489852  | No  |
| 70  | -0.839769787 | 0.529009606  | Yes |
| 71  | -0.381151316 | -0.979923438 | Yes |
| 72  | -0.516348771 | 1.013737367  | Yes |
| 73  | -1.426282315 | 0.05832638   | Yes |
| 75  | 0.259662287  | -0.92925422  | Yes |
| 76  | -0.803653238 | 0.092707224  | Yes |
| 77  | 1.561786287  | 0.131371616  | No  |
| 78  | 1.561786287  | 0.131371616  | No  |
| 80  | 0.958910444  | -0.30981253  | No  |
| 81  | 1.254728587  | -0.382855226 | No  |
| 82  | -0.762593446 | 0.452473674  | Yes |
| 83  | -0.733568856 | -0.533052791 | Yes |
| 85  | -0.097482861 | -0.696675954 | Yes |
| 86  | 0.11423672   | 0.715642151  | Yes |
| 87  | 1.561786287  | 0.131371616  | No  |
| 88  | 0.894354632  | 0.396491482  | No  |
| 90  | -1.426282315 | 0.05832638   | Yes |
| 91  | 1.561786287  | 0.131371616  | No  |
| 93  | -0.758293398 | -0.868390264 | Yes |
| 94  | 1.28233146   | 0.174915231  | No  |
| 95  | 0.237757722  | 0.551568271  | Yes |
| 96  | 1.254728587  | -0.382855226 | No  |
| 97  | -0.839769787 | 0.529009606  | Yes |
| 99  | 1.561786287  | 0.131371616  | No  |
| 100 | 1.561786287  | 0.131371616  | No  |
| 101 | 0.893797371  | 1.05808826   | No  |
| 102 | 0.605958569  | -0.101048383 | Yes |
| 103 | 0.20957484   | -0.182449113 | Yes |
| 104 | 0.274710661  | -0.712506197 | Yes |
| 105 | 0.569948795  | -0.96179582  | Yes |
| 106 | -1.426282315 | 0.05832638   | Yes |
| 107 | 1.561786287  | 0.131371616  | No  |
| 109 | -0.381151316 | -0.979923438 | Yes |
| 110 | 1.561786287  | 0.131371616  | No  |
| 112 | 0.660259644  | -0.521062391 | Yes |
| 113 | 0.967317345  | -0.00683555  | No  |
| 115 | -0.478838571 | -0.91193388  | Yes |
| 116 | -0.795803598 | 1.057280982  | Yes |
| 117 | 0.578783256  | 0.876337479  | Yes |
| 118 | -1.426282315 | 0.05832638   | Yes |
| 121 | 0.230665763  | 0.002344188  | Yes |

|     |              |              |     |
|-----|--------------|--------------|-----|
| 123 | 1.28233146   | 0.174915231  | No  |
| 124 | 1.200427511  | 0.037158782  | No  |
| 125 | -0.831256112 | -0.465063233 | Yes |
| 129 | -0.139206688 | 0.902204193  | Yes |
| 130 | -0.454114029 | -0.576596407 | Yes |
| 131 | -0.417267864 | -0.543621056 | Yes |
| 133 | 1.561786287  | 0.131371616  | No  |
| 134 | 0.881734103  | -0.233276597 | No  |
| 135 | 0.295221575  | -0.703959824 | Yes |
| 136 | 1.205155119  | 0.251451163  | No  |
| 137 | -1.426282315 | 0.05832638   | Yes |
| 139 | -1.426282315 | 0.05832638   | Yes |
| 140 | 0.274710661  | -0.712506197 | Yes |
| 141 | -1.426282315 | 0.05832638   | Yes |
| 142 | -0.469897336 | -0.370850399 | Yes |
| 143 | 0.290493968  | -0.918252205 | Yes |
| 144 | 0.939714472  | -0.564606007 | No  |
| 146 | -1.426282315 | 0.05832638   | Yes |
| 147 | -0.795696824 | -0.239768836 | Yes |
| 148 | 1.561786287  | 0.131371616  | No  |
| 150 | 0.958910444  | -0.30981253  | No  |
| 152 | 0.587296931  | -0.11773536  | Yes |
| 153 | 0.894354632  | 0.396491482  | No  |
| 154 | -1.426282315 | 0.05832638   | Yes |
| 156 | -1.110710939 | -0.421519617 | Yes |
| 157 | -1.146827488 | 0.014782764  | Yes |
| 159 | -0.054073933 | 0.4931922    | Yes |
| 160 | -0.746230131 | 0.422974593  | Yes |
| 161 | -0.787289923 | 0.063208143  | Yes |
| 162 | -0.524755672 | 0.710760387  | Yes |
| 163 | -1.146827488 | 0.014782764  | Yes |
| 166 | 1.561786287  | 0.131371616  | No  |
| 167 | 0.939714472  | -0.564606007 | No  |
| 168 | 1.246772172  | -0.050379165 | No  |
| 169 | 1.561786287  | 0.131371616  | No  |
| 171 | 0.491378803  | 0.604108977  | No  |
| 172 | -0.462047696 | 0.593723359  | Yes |
| 173 | 1.561786287  | 0.131371616  | No  |
| 174 | 1.254728587  | -0.382855226 | No  |
| 175 | 1.254728587  | -0.382855226 | No  |
| 176 | 0.2409205    | -0.283945816 | Yes |
| 177 | 0.889583743  | 0.73129716   | No  |
| 178 | 0.884856136  | 0.517004779  | No  |
| 179 | 0.56143512   | 0.032277018  | No  |
| 181 | -0.053516672 | -0.168404578 | Yes |
| 182 | 1.209368747  | 0.578242263  | No  |
| 183 | 0.499864413  | -0.336035805 | No  |

|     |              |              |     |
|-----|--------------|--------------|-----|
| 184 | 0.570376355  | 0.573360499  | No  |
| 186 | 0.512998922  | 0.181233556  | Yes |
| 187 | -1.119224614 | 0.572553221  | Yes |
| 189 | 1.254728587  | -0.382855226 | No  |
| 190 | 0.931307571  | -0.867582987 | No  |
| 192 | 0.967317345  | -0.00683555  | No  |
| 193 | 0.616293456  | -1.049333768 | Yes |
| 194 | 1.209368747  | 0.578242263  | No  |
| 196 | -0.790196319 | -0.105296783 | Yes |
| 197 | -0.474624944 | -0.58514278  | Yes |
| 200 | 0.267511928  | 0.035319538  | Yes |
| 201 | -1.049140232 | -0.053206794 | Yes |
| 202 | -1.069651147 | -0.061753168 | Yes |
| 203 | -0.462627704 | 0.417476432  | Yes |
| 205 | -0.692509064 | -0.173286342 | Yes |
| 206 | 0.616293456  | -1.049333768 | Yes |
| 208 | -0.10309014  | 0.465901811  | Yes |
| 209 | 0.54095227   | -0.030197412 | No  |
| 210 | 1.205155119  | 0.251451163  | No  |
| 211 | 0.58673967   | 0.543861418  | No  |
| 212 | -0.758293398 | -0.868390264 | Yes |
| 213 | -0.434872382 | -0.383662503 | Yes |
| 214 | -1.426282315 | 0.05832638   | Yes |
| 216 | 0.92991392   | 0.621785878  | No  |
| 217 | 0.823285429  | 0.148691956  | No  |
| 218 | -1.146827488 | 0.014782764  | Yes |
| 219 | -0.41014784  | -0.04832503  | Yes |
| 220 | -0.725719216 | 0.431520967  | Yes |
| 221 | -0.428837543 | -0.01108395  | Yes |
| 222 | 1.561786287  | 0.131371616  | No  |
| 224 | -1.426282315 | 0.05832638   | Yes |
| 225 | -1.049140232 | -0.053206794 | Yes |
| 226 | 0.610686177  | 0.113243998  | Yes |
| 230 | -0.17178087  | -0.397707038 | Yes |
| 231 | 0.184850298  | -0.517786586 | Yes |
| 232 | -1.119224614 | 0.572553221  | Yes |
| 233 | -1.426282315 | 0.05832638   | Yes |
| 234 | 0.168537795  | 0.295628143  | Yes |
| 235 | -0.10309014  | 0.465901811  | Yes |
| 236 | 1.246772172  | -0.050379165 | No  |
| 237 | -0.331150288 | -0.079073508 | Yes |
| 238 | 1.561786287  | 0.131371616  | No  |
| 240 | 0.605958569  | -0.101048383 | No  |
| 241 | -1.426282315 | 0.05832638   | Yes |
| 242 | -0.787847184 | 0.724804921  | Yes |
| 243 | -0.804210499 | 0.754304002  | Yes |
| 245 | -0.479395832 | -0.250337102 | Yes |

|     |              |              |     |
|-----|--------------|--------------|-----|
| 246 | -0.741502523 | 0.637266974  | Yes |
| 247 | -0.209184296 | 0.23091439   | Yes |
| 248 | -0.717233606 | -0.508623815 | Yes |
| 249 | -1.426282315 | 0.05832638   | Yes |
| 250 | 0.843796343  | 0.15723833   | No  |
| 251 | -1.110710939 | -0.421519617 | Yes |
| 252 | 0.233544095  | 0.224777172  | Yes |
| 253 | -0.480232222 | 0.577434985  | Yes |
| 255 | -1.049140232 | -0.053206794 | Yes |
| 256 | -1.049140232 | -0.053206794 | Yes |
| 257 | -0.757865838 | 0.666766055  | Yes |
| 258 | 0.97527376   | -0.33931161  | No  |
| 259 | -0.478838571 | -0.91193388  | Yes |
| 260 | 0.56199238   | -0.62931976  | No  |
| 261 | -0.437778779 | -0.55216743  | Yes |
| 262 | -1.426282315 | 0.05832638   | Yes |
| 263 | -0.168124504 | 0.590680839  | Yes |
| 268 | -0.0577303   | -0.495195677 | Yes |
| 269 | -0.10309014  | 0.465901811  | Yes |
| 271 | 1.561786287  | 0.131371616  | No  |
| 272 | 0.263875915  | -0.602463121 | Yes |
| 273 | 0.56143512   | 0.032277018  | No  |
| 274 | 0.56143512   | 0.032277018  | No  |
| 276 | -0.122207403 | -1.032013427 | Yes |
| 277 | -0.787289923 | 0.063208143  | Yes |
| 278 | -0.472275808 | 0.244958924  | Yes |
| 279 | 1.561786287  | 0.131371616  | No  |
| 280 | -1.426282315 | 0.05832638   | Yes |
| 281 | -1.426282315 | 0.05832638   | Yes |
| 283 | -0.454114029 | -0.576596407 | Yes |
| 284 | -1.146827488 | 0.014782764  | Yes |
| 285 | -0.758293398 | -0.868390264 | Yes |
| 286 | 0.931307571  | -0.867582987 | No  |
| 289 | 0.239151373  | -0.937800594 | Yes |
| 293 | 0.155853773  | 0.413811822  | Yes |
| 294 | -0.40166223  | -0.988469812 | Yes |
| 295 | 0.221724527  | -0.538739293 | Yes |
| 297 | 0.881734103  | -0.233276597 | No  |
| 298 | -1.069651147 | -0.061753168 | Yes |
| 299 | -1.146827488 | 0.014782764  | Yes |
| 300 | -0.692509064 | -0.173286342 | Yes |
| 303 | -0.749352163 | -0.327306784 | Yes |
| 304 | -1.146827488 | 0.014782764  | Yes |
| 305 | -0.762593446 | 0.452473674  | Yes |
| 306 | 1.28233146   | 0.174915231  | No  |
| 307 | 0.151640146  | 0.087020723  | Yes |
| 308 | -1.426282315 | 0.05832638   | Yes |

|     |              |              |     |
|-----|--------------|--------------|-----|
| 309 | -0.101696489 | -1.023467053 | Yes |
| 310 | -0.118037056 | -0.156124268 | Yes |
| 311 | -0.127814681 | 0.130564338  | Yes |
| 313 | -1.426282315 | 0.05832638   | Yes |
| 314 | 1.561786287  | 0.131371616  | No  |
| 316 | -0.082027281 | 0.704623169  | Yes |
| 317 | -0.516348771 | 1.013737367  | Yes |
| 318 | -0.430658755 | -0.056871404 | Yes |
| 319 | 0.299435203  | -0.377168724 | Yes |
| 320 | 1.561786287  | 0.131371616  | No  |
| 321 | 1.561786287  | 0.131371616  | No  |
| 322 | -0.155417555 | -0.427206119 | Yes |
| 323 | -1.426282315 | 0.05832638   | Yes |
| 324 | -1.426282315 | 0.05832638   | Yes |
| 325 | 0.259662287  | -0.92925422  | Yes |
| 326 | -0.122207403 | -1.032013427 | Yes |
| 327 | 0.524588955  | -0.000698332 | No  |
| 328 | -0.787847184 | 0.724804921  | Yes |
| 329 | 1.561786287  | 0.131371616  | No  |
| 330 | -0.101268928 | 0.511689265  | Yes |
| 332 | -0.093312514 | 0.179213205  | Yes |
| 333 | -0.462047696 | 0.593723359  | Yes |
| 334 | 0.282537553  | -0.585776144 | Yes |
| 337 | 0.92991392   | 0.621785878  | No  |
| 338 | 1.209368747  | 0.578242263  | No  |
| 339 | -1.426282315 | 0.05832638   | Yes |
| 340 | -1.119224614 | 0.572553221  | Yes |
| 342 | -0.443279283 | -0.686639483 | Yes |
| 343 | -1.426282315 | 0.05832638   | Yes |
| 345 | -0.434872382 | -0.383662503 | Yes |
| 346 | -0.127814681 | 0.130564338  | Yes |
| 347 | -0.01979254  | -0.885710605 | Yes |
| 349 | 0.201213613  | -0.547285666 | Yes |
| 350 | 1.561786287  | 0.131371616  | No  |
| 351 | 1.561786287  | 0.131371616  | No  |
| 352 | 1.561786287  | 0.131371616  | No  |
| 353 | 1.561786287  | 0.131371616  | No  |
| 354 | -0.427068416 | 0.642770828  | Yes |
| 356 | -1.049140232 | -0.053206794 | Yes |
| 357 | -0.478838571 | -0.91193388  | Yes |
| 358 | -0.831256112 | -0.465063233 | Yes |
| 360 | 1.561786287  | 0.131371616  | No  |
| 361 | 0.176364687  | 0.422358196  | Yes |
| 363 | -0.163396896 | 0.80497322   | Yes |
| 364 | -0.381151316 | -0.979923438 | Yes |
| 365 | -1.049140232 | -0.053206794 | Yes |
| 366 | 0.893797371  | 1.05808826   | No  |

|     |              |              |     |
|-----|--------------|--------------|-----|
| 367 | -1.1112682   | 0.240077161  | Yes |
| 368 | -1.1112682   | 0.240077161  | Yes |
| 369 | -0.40166223  | -0.988469812 | Yes |
| 370 | -0.097482861 | -0.696675954 | Yes |
| 373 | -0.154989995 | 1.1079502    | Yes |
| 374 | -0.201334656 | 1.195488148  | Yes |
| 375 | 1.200427511  | 0.037158782  | No  |
| 376 | 0.537723463  | 0.516571029  | Yes |
| 378 | -0.524198411 | 0.049163609  | Yes |
| 379 | 0.517212549  | 0.508024656  | Yes |
| 381 | 0.56199238   | -0.62931976  | Yes |
| 382 | -1.069651147 | -0.061753168 | Yes |
| 383 | 1.561786287  | 0.131371616  | No  |
| 384 | 1.200427511  | 0.037158782  | No  |
| 385 | 0.885413396  | -0.144591999 | No  |
| 386 | 0.532995856  | 0.302278648  | Yes |
| 387 | -0.443279283 | -0.686639483 | Yes |
| 389 | 0.890141004  | 0.069700382  | No  |
| 392 | 0.336838628  | -1.005790152 | Yes |
| 394 | 0.605958569  | -0.101048383 | Yes |
| 395 | -1.110710939 | -0.421519617 | Yes |
| 396 | 1.561786287  | 0.131371616  | No  |
| 397 | 0.200656352  | 0.114311112  | Yes |
| 399 | 0.528782228  | -0.024512451 | Yes |
| 400 | -0.524198411 | 0.049163609  | Yes |
| 401 | -1.049140232 | -0.053206794 | Yes |
| 402 | 1.254728587  | -0.382855226 | No  |
| 403 | -0.831256112 | -0.465063233 | Yes |
| 404 | -1.1112682   | 0.240077161  | Yes |
| 405 | -0.795803598 | 1.057280982  | Yes |
| 406 | -0.795803598 | 1.057280982  | Yes |
| 407 | 1.561786287  | 0.131371616  | No  |
| 409 | 0.614899804  | 0.440035097  | Yes |
| 410 | -1.146827488 | 0.014782764  | Yes |
| 411 | -1.426282315 | 0.05832638   | Yes |
| 412 | 0.249327401  | 0.019031164  | Yes |
| 413 | -0.060636696 | -0.663700604 | Yes |
| 414 | 1.254728587  | -0.382855226 | No  |
| 415 | 0.651852744  | -0.824039371 | Yes |
| 416 | 1.561786287  | 0.131371616  | No  |
| 418 | -0.074093615 | -0.465696597 | Yes |
| 419 | 0.590175263  | 0.104697624  | No  |
| 420 | -0.758293398 | -0.868390264 | Yes |
| 421 | -0.209184296 | 0.23091439   | Yes |
| 422 | -0.123601054 | 0.457355437  | Yes |
| 423 | 0.610128916  | 0.774840776  | No  |
| 425 | -0.392720995 | -0.447386331 | Yes |

|     |              |              |     |
|-----|--------------|--------------|-----|
| 427 | 0.282537553  | -0.585776144 | Yes |
| 428 | 0.546209074  | -0.423573752 | Yes |
| 430 | 1.246772172  | -0.050379165 | No  |
| 431 | -1.110710939 | -0.421519617 | Yes |
| 432 | 0.939714472  | -0.564606007 | No  |
| 433 | -1.069651147 | -0.061753168 | Yes |
| 435 | 0.266754247  | -0.380030137 | Yes |
| 436 | 0.923351156  | -0.535106926 | No  |
| 437 | 0.192806712  | -0.850262646 | Yes |
| 438 | 0.299328429  | 0.919881094  | Yes |
| 439 | -0.097482861 | -0.696675954 | Yes |
| 440 | -0.474624944 | -0.58514278  | Yes |
| 441 | -0.474624944 | -0.58514278  | Yes |
| 442 | -0.758293398 | -0.868390264 | Yes |
| 443 | -0.089876921 | -0.259950589 | Yes |
| 444 | -0.092755253 | -0.482383573 | Yes |
| 445 | -0.454114029 | -0.576596407 | Yes |
| 446 | 0.566719988  | -0.415027378 | No  |
| 447 | 1.561786287  | 0.131371616  | No  |
| 448 | -1.426282315 | 0.05832638   | Yes |
| 449 | -0.101696489 | -1.023467053 | Yes |
| 450 | -0.804210499 | 0.754304002  | Yes |
| 451 | -0.795803598 | 1.057280982  | Yes |
| 452 | 0.205361212  | -0.509240212 | Yes |
| 453 | -0.478838571 | -0.91193388  | Yes |
| 454 | -0.803653238 | 0.092707224  | Yes |
| 455 | 1.561786287  | 0.131371616  | No  |
| 456 | -0.804210499 | 0.754304002  | Yes |
| 457 | 0.281980292  | 0.075820634  | Yes |
| 458 | 0.877006495  | -0.447568979 | No  |
| 459 | 0.877006495  | -0.447568979 | No  |
| 461 | 1.184644205  | 0.24290479   | No  |
| 462 | 0.939714472  | -0.564606007 | No  |
| 463 | -1.146827488 | 0.014782764  | Yes |
| 464 | -0.086754889 | 0.490330787  | Yes |
| 466 | -0.434444822 | 1.151493815  | Yes |
| 467 | 1.246772172  | -0.050379165 | No  |
| 469 | -0.092755253 | -0.482383573 | Yes |
| 471 | -1.069651147 | -0.061753168 | Yes |
| 472 | 1.238365271  | -0.353356145 | No  |
| 473 | 0.56143512   | 0.032277018  | No  |
| 474 | 0.570376355  | 0.573360499  | No  |
| 476 | 0.893797371  | 1.05808826   | No  |
| 477 | -1.119224614 | 0.572553221  | Yes |
| 479 | 0.569948795  | -0.96179582  | Yes |
| 480 | 1.561786287  | 0.131371616  | No  |
| 482 | -1.426282315 | 0.05832638   | Yes |



|     |              |              |     |
|-----|--------------|--------------|-----|
| 483 | -0.451235697 | -0.354163423 | Yes |
| 484 | -0.094604529 | -0.47424297  | Yes |
| 485 | -1.146827488 | 0.014782764  | Yes |
| 486 | -0.754079771 | -0.541599165 | Yes |
| 487 | -0.831813372 | 0.196533545  | Yes |
| 489 | -0.451235697 | -0.354163423 | Yes |
| 490 | 1.200427511  | 0.037158782  | No  |
| 492 | -1.426282315 | 0.05832638   | Yes |
| 493 | -0.162839635 | 0.143376442  | Yes |
| 494 | 1.246772172  | -0.050379165 | No  |
| 495 | -0.787847184 | 0.724804921  | Yes |
| 496 | -1.426282315 | 0.05832638   | Yes |
| 497 | 0.532995856  | 0.302278648  | No  |
| 498 | -1.064923539 | 0.152539213  | Yes |
| 499 | 0.167957787  | 0.119381216  | Yes |
| 500 | -0.451235697 | -0.354163423 | Yes |
| 501 | -1.426282315 | 0.05832638   | Yes |
| 502 | 0.574676403  | -0.747503439 | Yes |
| 503 | -0.823406472 | 0.499510525  | Yes |
| 504 | -0.795696824 | -0.239768836 | Yes |
| 505 | 0.566162728  | 0.2465694    | No  |
| 507 | 0.163810188  | 0.081335762  | Yes |
| 508 | 0.163810188  | 0.081335762  | Yes |
| 509 | 1.205155119  | 0.251451163  | No  |
| 511 | -0.127814681 | 0.130564338  | Yes |
| 512 | -0.790196319 | -0.105296783 | Yes |
| 513 | 1.238365271  | -0.353356145 | No  |
| 514 | 0.205361212  | -0.509240212 | Yes |
| 515 | -1.426282315 | 0.05832638   | Yes |
| 516 | 0.922793896  | 0.126489852  | No  |
| 517 | 0.922793896  | 0.126489852  | No  |
| 519 | -1.426282315 | 0.05832638   | Yes |
| 520 | -0.696722692 | -0.500077441 | Yes |
| 521 | 0.616293456  | -1.049333768 | Yes |
| 522 | -0.119430707 | 1.333244596  | Yes |
| 523 | -0.708292371 | 0.032459666  | Yes |
| 524 | -0.839769787 | 0.529009606  | Yes |
| 525 | -1.426282315 | 0.05832638   | Yes |
| 526 | -0.165218107 | 0.759185766  | Yes |
| 528 | -1.073864774 | -0.388544267 | Yes |
| 529 | -0.696722692 | -0.500077441 | Yes |
| 531 | 1.561786287  | 0.131371616  | No  |
| 532 | -1.064923539 | 0.152539213  | Yes |
| 533 | 0.920972684  | 0.080702398  | No  |
| 536 | 1.28233146   | 0.174915231  | No  |
| 537 | 1.238365271  | -0.353356145 | No  |
| 539 | -0.454114029 | -0.576596407 | Yes |

|     |              |              |     |
|-----|--------------|--------------|-----|
| 540 | 1.200427511  | 0.037158782  | No  |
| 542 | 0.259662287  | -0.92925422  | Yes |
| 544 | -1.426282315 | 0.05832638   | Yes |
| 545 | -0.376937688 | -0.653132339 | Yes |
| 546 | 1.561786287  | 0.131371616  | No  |
| 547 | -0.480232222 | 0.577434985  | Yes |
| 548 | 0.151640146  | 0.087020723  | Yes |
| 549 | -1.426282315 | 0.05832638   | Yes |
| 550 | -0.105416527 | 0.473643811  | Yes |
| 551 | 0.290493968  | -0.918252205 | Yes |
| 552 | 0.884856136  | 0.517004779  | No  |
| 553 | -0.17178087  | -0.397707038 | Yes |
| 555 | 0.230665763  | 0.002344188  | Yes |
| 556 | -0.804210499 | 0.754304002  | Yes |
| 557 | -0.113266168 | -0.490929947 | Yes |
| 558 | -0.754079771 | -0.541599165 | Yes |
| 559 | 0.885413396  | -0.144591999 | No  |
| 560 | -1.426282315 | 0.05832638   | Yes |
| 563 | -0.200777395 | 0.53389137   | Yes |
| 564 | 1.28233146   | 0.174915231  | No  |
| 567 | -0.437778779 | -0.55216743  | Yes |
| 568 | 0.295221575  | -0.703959824 | Yes |
| 569 | -1.426282315 | 0.05832638   | Yes |
| 570 | -0.754079771 | -0.541599165 | Yes |
| 572 | 0.923351156  | -0.535106926 | No  |
| 573 | 0.97527376   | -0.33931161  | No  |
| 574 | 0.252983768  | 1.007419042  | Yes |
| 575 | -0.36436044  | 0.5257338    | Yes |
| 579 | -0.172338131 | 0.26388974   | Yes |
| 580 | -0.790196319 | -0.105296783 | Yes |
| 581 | -0.159717603 | 0.893657819  | Yes |
| 582 | -1.426282315 | 0.05832638   | Yes |
| 583 | 0.894354632  | 0.396491482  | No  |
| 584 | 1.561786287  | 0.131371616  | No  |
| 585 | -0.795803598 | 1.057280982  | Yes |
| 586 | 0.205361212  | -0.509240212 | Yes |
| 587 | -0.17178087  | -0.397707038 | Yes |
| 588 | -0.795803598 | 1.057280982  | Yes |
| 590 | -0.101696489 | -1.023467053 | Yes |
| 591 | -0.524198411 | 0.049163609  | Yes |
| 592 | 0.192806712  | -0.850262646 | Yes |
| 593 | 0.220409586  | -0.292492189 | Yes |
| 594 | 1.246772172  | -0.050379165 | No  |
| 596 | 1.28233146   | 0.174915231  | No  |
| 598 | -0.831256112 | -0.465063233 | Yes |
| 599 | -1.146827488 | 0.014782764  | Yes |
| 600 | -0.110210164 | -0.029394215 | Yes |

|     |              |              |     |
|-----|--------------|--------------|-----|
| 601 | -1.426282315 | 0.05832638   | Yes |
| 602 | 0.610686177  | 0.113243998  | No  |
| 603 | 0.614899804  | 0.440035097  | No  |
| 604 | -1.426282315 | 0.05832638   | Yes |
| 605 | -1.426282315 | 0.05832638   | Yes |
| 606 | -1.426282315 | 0.05832638   | Yes |
| 607 | 0.517212549  | 0.508024656  | No  |
| 608 | 0.525168964  | 0.175548595  | Yes |
| 609 | 0.525168964  | 0.175548595  | Yes |
| 610 | -1.426282315 | 0.05832638   | Yes |
| 611 | -0.434872382 | -0.383662503 | Yes |
| 612 | 0.660259644  | -0.521062391 | Yes |
| 614 | -0.795696824 | -0.239768836 | Yes |
| 615 | -0.05730274  | 1.039960642  | Yes |
| 617 | -1.110710939 | -0.421519617 | Yes |
| 618 | -0.803653238 | 0.092707224  | Yes |
| 619 | -1.110710939 | -0.421519617 | Yes |
| 620 | -1.110710939 | -0.421519617 | Yes |
| 621 | -1.426282315 | 0.05832638   | Yes |
| 622 | -0.790196319 | -0.105296783 | Yes |
| 623 | -1.426282315 | 0.05832638   | Yes |
| 624 | -1.426282315 | 0.05832638   | Yes |
| 625 | -0.478838571 | -0.91193388  | Yes |
| 626 | -1.426282315 | 0.05832638   | Yes |
| 627 | 0.923351156  | -0.535106926 | No  |
| 628 | 0.56199238   | -0.62931976  | Yes |
| 629 | 0.967317345  | -0.00683555  | No  |
| 630 | 0.614899804  | 0.440035097  | Yes |
| 631 | -1.426282315 | 0.05832638   | Yes |
| 633 | 0.151640146  | 0.087020723  | Yes |
| 634 | 0.529316563  | 0.213594049  | Yes |
| 636 | -0.487352246 | 0.082138959  | Yes |
| 637 | 1.238365271  | -0.353356145 | No  |
| 638 | 0.920972684  | 0.080702398  | No  |
| 639 | 0.925700292  | 0.294994779  | No  |
| 640 | -0.43917243  | 0.937201434  | Yes |
| 641 | 0.54855821   | 0.406527953  | Yes |
| 642 | 1.561786287  | 0.131371616  | No  |
| 644 | 0.532995856  | 0.302278648  | No  |
| 646 | -0.201334656 | 1.195488148  | Yes |
| 648 | -1.426282315 | 0.05832638   | Yes |
| 650 | 0.614342544  | 1.101631875  | Yes |
| 651 | 0.532438595  | 0.963875426  | Yes |
| 652 | -0.478411011 | 0.623222439  | Yes |
| 653 | 1.561786287  | 0.131371616  | No  |
| 654 | -0.462627704 | 0.417476432  | Yes |
| 655 | -0.139206688 | 0.902204193  | Yes |

|     |              |              |     |
|-----|--------------|--------------|-----|
| 656 | -0.074093615 | -0.465696597 | Yes |
| 657 | -1.146827488 | 0.014782764  | Yes |
| 658 | -1.426282315 | 0.05832638   | Yes |
| 659 | -0.43917243  | 0.937201434  | Yes |
| 660 | -0.516348771 | 1.013737367  | Yes |
| 661 | -1.146827488 | 0.014782764  | Yes |
| 662 | 1.561786287  | 0.131371616  | No  |
| 663 | -0.147056329 | -0.062369565 | Yes |
| 665 | 1.200427511  | 0.037158782  | No  |
| 666 | -0.758293398 | -0.868390264 | Yes |
| 667 | 1.561786287  | 0.131371616  | No  |
| 668 | -0.687781456 | 0.041006039  | Yes |
| 669 | -1.146827488 | 0.014782764  | Yes |
| 670 | -0.831256112 | -0.465063233 | Yes |
| 671 | 0.616293456  | -1.049333768 | Yes |
| 672 | -0.162839635 | 0.143376442  | Yes |
| 674 | -1.119224614 | 0.572553221  | Yes |
| 675 | -0.766807073 | 0.125682574  | Yes |
| 676 | 1.28233146   | 0.174915231  | No  |
| 677 | -0.376937688 | -0.653132339 | Yes |
| 679 | -0.516348771 | 1.013737367  | Yes |
| 680 | -0.070437248 | 0.522691281  | Yes |
| 681 | -1.064923539 | 0.152539213  | Yes |
| 682 | -1.426282315 | 0.05832638   | Yes |
| 684 | -0.451235697 | -0.354163423 | Yes |
| 685 | -1.110710939 | -0.421519617 | Yes |
| 686 | -0.757865838 | 0.666766055  | Yes |
| 688 | 1.246772172  | -0.050379165 | No  |
| 689 | -0.028306215 | 0.108362234  | Yes |
| 690 | -1.426282315 | 0.05832638   | Yes |
| 691 | -0.478838571 | -0.91193388  | Yes |
| 694 | -1.049140232 | -0.053206794 | Yes |
| 696 | 1.254728587  | -0.382855226 | No  |
| 697 | 0.898097419  | -0.262775678 | No  |
| 698 | -0.069879988 | -0.138905497 | Yes |
| 700 | -0.40166223  | -0.988469812 | Yes |
| 702 | 1.184644205  | 0.24290479   | No  |
| 703 | 0.939157211  | 0.096990771  | No  |
| 704 | -0.839769787 | 0.529009606  | Yes |
| 705 | 1.561786287  | 0.131371616  | No  |
| 706 | 0.920972684  | 0.080702398  | No  |
| 707 | 0.193791533  | 0.023296895  | Yes |
| 708 | -0.754079771 | -0.541599165 | Yes |
| 710 | -0.434444822 | 1.151493815  | Yes |
| 711 | 0.570933616  | -0.088236279 | No  |
| 712 | -0.785468712 | 0.108995598  | Yes |
| 713 | -1.426282315 | 0.05832638   | Yes |

|     |              |              |     |
|-----|--------------|--------------|-----|
| 715 | 1.200427511  | 0.037158782  | No  |
| 716 | 1.561786287  | 0.131371616  | No  |
| 717 | 0.225938155  | -0.211948193 | Yes |
| 718 | -0.831256112 | -0.465063233 | Yes |
| 719 | 0.931307571  | -0.867582987 | No  |
| 720 | 0.57889003   | -0.42071234  | No  |
| 721 | 0.931307571  | -0.867582987 | No  |
| 722 | -0.443279283 | -0.686639483 | Yes |
| 726 | 1.28233146   | 0.174915231  | No  |
| 727 | 1.28233146   | 0.174915231  | No  |
| 728 | -1.426282315 | 0.05832638   | Yes |
| 729 | -1.110710939 | -0.421519617 | Yes |
| 730 | -0.480232222 | 0.577434985  | Yes |
| 731 | 0.828013037  | 0.362984337  | No  |
| 732 | -0.516348771 | 1.013737367  | Yes |
| 734 | -0.749352163 | -0.327306784 | Yes |
| 737 | 0.143233245  | -0.215956257 | Yes |
| 738 | 1.238365271  | -0.353356145 | No  |
| 739 | -1.426282315 | 0.05832638   | Yes |
| 740 | 1.184644205  | 0.24290479   | No  |
| 741 | -0.417267864 | -0.543621056 | Yes |
| 743 | -0.066243975 | 0.498877161  | Yes |
| 744 | -0.725719216 | 0.431520967  | Yes |
| 745 | -1.146827488 | 0.014782764  | Yes |
| 746 | -0.413054237 | -0.216829957 | Yes |
| 747 | 1.561786287  | 0.131371616  | No  |
| 748 | -0.839769787 | 0.529009606  | Yes |
| 749 | -1.110710939 | -0.421519617 | Yes |
| 750 | -0.17178087  | -0.397707038 | Yes |
| 751 | 0.151640146  | 0.087020723  | Yes |
| 752 | -1.119224614 | 0.572553221  | Yes |
| 753 | -0.758293398 | -0.868390264 | Yes |
| 754 | 1.561786287  | 0.131371616  | No  |
| 755 | -0.734126117 | 0.128543987  | Yes |
| 756 | -1.426282315 | 0.05832638   | Yes |
| 757 | 0.643896329  | -0.491563311 | No  |
| 760 | -0.687781456 | 0.041006039  | Yes |
| 761 | 0.894354632  | 0.396491482  | No  |
| 762 | -0.396934622 | -0.774177431 | Yes |
| 763 | -1.426282315 | 0.05832638   | Yes |
| 764 | -0.066243975 | 0.498877161  | Yes |
| 766 | -0.048817129 | 0.09981586   | Yes |
| 767 | -1.110710939 | -0.421519617 | Yes |
| 768 | -0.795803598 | 1.057280982  | Yes |
| 769 | 1.246772172  | -0.050379165 | No  |
| 771 | 1.561786287  | 0.131371616  | No  |
| 772 | -1.426282315 | 0.05832638   | Yes |

|     |              |              |     |
|-----|--------------|--------------|-----|
| 773 | -1.110710939 | -0.421519617 | Yes |
| 774 | 0.56199238   | -0.62931976  | Yes |
| 776 | -0.746230131 | 0.422974593  | Yes |
| 777 | 0.660259644  | -0.521062391 | Yes |
| 778 | -1.119224614 | 0.572553221  | Yes |
| 779 | -0.066243975 | 0.498877161  | Yes |
| 783 | -1.426282315 | 0.05832638   | Yes |
| 784 | 0.967317345  | -0.00683555  | No  |
| 785 | 1.246772172  | -0.050379165 | No  |
| 786 | -0.795803598 | 1.057280982  | Yes |
| 787 | 1.238365271  | -0.353356145 | No  |
| 788 | -0.118873446 | 0.671647818  | Yes |
| 789 | -0.055909088 | -0.449408223 | Yes |
| 792 | -0.831256112 | -0.465063233 | Yes |
| 793 | 0.56199238   | -0.62931976  | No  |
| 794 | -1.146827488 | 0.014782764  | Yes |
| 795 | -0.790196319 | -0.105296783 | Yes |
| 796 | -0.086754889 | 0.490330787  | Yes |
| 797 | -1.426282315 | 0.05832638   | Yes |
| 798 | 0.923351156  | -0.535106926 | No  |
| 800 | -1.110710939 | -0.421519617 | Yes |
| 801 | -0.454114029 | -0.576596407 | Yes |
| 802 | 0.20957484   | -0.182449113 | Yes |
| 803 | -0.451235697 | -0.354163423 | Yes |
| 804 | -1.119224614 | 0.572553221  | Yes |
| 805 | 1.561786287  | 0.131371616  | No  |
| 806 | -0.478838571 | -0.91193388  | Yes |
| 807 | -0.478838571 | -0.91193388  | Yes |
| 808 | -0.478838571 | -0.91193388  | Yes |
| 810 | -0.790196319 | -0.105296783 | Yes |
| 811 | 1.246772172  | -0.050379165 | No  |
| 813 | -0.742082532 | 0.461020047  | Yes |
| 814 | -1.426282315 | 0.05832638   | Yes |
| 817 | -0.089876921 | -0.259950589 | Yes |
| 818 | 0.569948795  | -0.96179582  | No  |
| 820 | -0.451235697 | -0.354163423 | Yes |
| 821 | -0.123601054 | 0.457355437  | Yes |
| 822 | 0.516655288  | 1.169621434  | No  |
| 823 | 0.508271314  | -0.033058825 | No  |
| 824 | 0.239151373  | -0.937800594 | Yes |
| 825 | 1.28233146   | 0.174915231  | No  |
| 826 | 1.561786287  | 0.131371616  | No  |
| 827 | 0.923351156  | -0.535106926 | No  |
| 828 | 1.246772172  | -0.050379165 | No  |
| 829 | -1.426282315 | 0.05832638   | Yes |
| 831 | 0.257711376  | 1.221711423  | Yes |
| 832 | -1.426282315 | 0.05832638   | Yes |

|     |              |              |     |
|-----|--------------|--------------|-----|
| 834 | 1.209368747  | 0.578242263  | No  |
| 835 | 1.209368747  | 0.578242263  | No  |
| 836 | 1.209368747  | 0.578242263  | No  |
| 837 | -1.426282315 | 0.05832638   | Yes |
| 838 | -0.451235697 | -0.354163423 | Yes |
| 839 | 1.561786287  | 0.131371616  | No  |
| 840 | -0.105996536 | 0.297396884  | Yes |
| 841 | 0.336838628  | -1.005790152 | Yes |
| 842 | 0.898097419  | -0.262775678 | No  |
| 843 | -1.426282315 | 0.05832638   | Yes |
| 844 | 0.15959656   | -0.245455338 | Yes |
| 845 | -0.795803598 | 1.057280982  | Yes |
| 846 | 1.246772172  | -0.050379165 | No  |
| 848 | 0.56199238   | -0.62931976  | Yes |
| 850 | 0.228816487  | 0.01048479   | Yes |
| 852 | -0.433051171 | -0.337875049 | Yes |
| 853 | -0.749352163 | -0.327306784 | Yes |
| 854 | 0.211923975  | 0.647652592  | Yes |
| 855 | 0.893369811  | -0.477068059 | No  |
| 857 | -0.101696489 | -1.023467053 | Yes |
| 858 | -0.516348771 | 1.013737367  | Yes |
| 859 | -1.426282315 | 0.05832638   | Yes |
| 860 | -1.426282315 | 0.05832638   | Yes |
| 861 | -1.426282315 | 0.05832638   | Yes |
| 862 | -1.110710939 | -0.421519617 | Yes |
| 863 | -1.1112682   | 0.240077161  | Yes |
| 864 | -0.16393123  | 0.56686672   | Yes |
| 865 | 0.881734103  | -0.233276597 | No  |
| 866 | -0.831256112 | -0.465063233 | Yes |
| 867 | -1.426282315 | 0.05832638   | Yes |
| 868 | 1.561786287  | 0.131371616  | No  |
| 869 | -0.331150288 | -0.079073508 | Yes |
| 870 | -0.430658755 | -0.056871404 | Yes |
| 872 | -1.426282315 | 0.05832638   | Yes |
| 873 | -0.40166223  | -0.988469812 | Yes |
| 874 | 1.561786287  | 0.131371616  | No  |
| 875 | 0.237200461  | 1.213165049  | Yes |
| 876 | -0.516348771 | 1.013737367  | Yes |
| 877 | -1.426282315 | 0.05832638   | Yes |
| 878 | 0.11423672   | 0.715642151  | Yes |
| 879 | -0.758293398 | -0.868390264 | Yes |
| 880 | 1.238365271  | -0.353356145 | No  |
| 882 | 0.616293456  | -1.049333768 | No  |
| 883 | -0.785468712 | 0.108995598  | Yes |
| 884 | -0.10309014  | 0.465901811  | Yes |
| 885 | 1.561786287  | 0.131371616  | No  |
| 886 | -1.426282315 | 0.05832638   | Yes |

|     |              |              |     |
|-----|--------------|--------------|-----|
| 887 | 0.257711376  | 1.221711423  | Yes |
| 888 | -0.109630155 | 0.146852712  | Yes |
| 889 | 0.582526043  | 0.217070319  | No  |
| 890 | 0.582526043  | 0.217070319  | No  |
| 891 | -1.426282315 | 0.05832638   | Yes |
| 892 | 1.561786287  | 0.131371616  | No  |
| 893 | 0.211923975  | 0.647652592  | Yes |
| 894 | -1.426282315 | 0.05832638   | Yes |
| 895 | 0.249327401  | 0.019031164  | Yes |
| 896 | 1.561786287  | 0.131371616  | No  |
| 897 | -0.746230131 | 0.422974593  | Yes |
| 898 | -1.426282315 | 0.05832638   | Yes |
| 899 | -1.069651147 | -0.061753168 | Yes |
| 901 | -0.762593446 | 0.452473674  | Yes |
| 902 | -0.154989995 | 1.1079502    | Yes |
| 903 | -0.790196319 | -0.105296783 | Yes |
| 905 | -0.396934622 | -0.774177431 | Yes |
| 908 | -1.426282315 | 0.05832638   | Yes |
| 909 | 0.239151373  | -0.937800594 | Yes |
| 910 | -1.426282315 | 0.05832638   | Yes |
| 911 | -0.076420003 | -0.457954597 | Yes |
| 913 | 0.25493468   | -1.143546601 | Yes |
| 914 | 1.184644205  | 0.24290479   | No  |
| 916 | -0.839769787 | 0.529009606  | Yes |
| 917 | 1.246772172  | -0.050379165 | No  |
| 918 | -1.119224614 | 0.572553221  | Yes |
| 919 | -1.102861299 | 0.54305414   | Yes |
| 920 | 0.890141004  | 0.069700382  | No  |
| 921 | 1.28233146   | 0.174915231  | No  |
| 922 | -0.331150288 | -0.079073508 | Yes |
| 924 | -0.44702207  | -0.027372323 | Yes |
| 926 | -0.478838571 | -0.91193388  | Yes |
| 927 | 0.193234272  | 0.684893673  | Yes |
| 928 | 0.537166203  | 1.178167807  | No  |
| 929 | 0.508805648  | 0.205047676  | No  |
| 930 | 0.16002412   | 1.289700981  | Yes |
| 931 | 0.537166203  | 1.178167807  | No  |
| 935 | 0.92991392   | 0.621785878  | No  |
| 936 | -0.831256112 | -0.465063233 | Yes |
| 937 | 0.564341516  | 0.200781945  | Yes |
| 938 | 1.246214912  | 0.611217613  | No  |
| 939 | 0.607779781  | -0.055260929 | Yes |
| 940 | 0.922793896  | 0.126489852  | No  |
| 941 | 1.238365271  | -0.353356145 | No  |
| 943 | 1.561786287  | 0.131371616  | No  |
| 944 | -1.426282315 | 0.05832638   | Yes |
| 945 | 0.569948795  | -0.96179582  | Yes |



|      |              |              |     |
|------|--------------|--------------|-----|
| 947  | -0.396934622 | -0.774177431 | Yes |
| 949  | 1.246772172  | -0.050379165 | No  |
| 950  | 0.890141004  | 0.069700382  | No  |
| 951  | -1.049140232 | -0.053206794 | Yes |
| 952  | -1.049140232 | -0.053206794 | Yes |
| 954  | 0.2409205    | -0.283945816 | Yes |
| 955  | 0.881734103  | -0.233276597 | No  |
| 956  | -1.426282315 | 0.05832638   | Yes |
| 957  | -0.016136173 | 0.102677273  | Yes |
| 958  | -1.110710939 | -0.421519617 | Yes |
| 959  | 0.939714472  | -0.564606007 | No  |
| 960  | 0.221724527  | -0.538739293 | Yes |
| 961  | -0.454114029 | -0.576596407 | Yes |
| 962  | -0.434444822 | 1.151493815  | Yes |
| 963  | -0.754079771 | -0.541599165 | Yes |
| 965  | -0.839769787 | 0.529009606  | Yes |
| 966  | -0.385451363 | 0.3409405    | Yes |
| 967  | -0.804210499 | 0.754304002  | Yes |
| 968  | 0.546209074  | -0.423573752 | No  |
| 969  | 0.564341516  | 0.200781945  | Yes |
| 970  | 0.923351156  | -0.535106926 | No  |
| 971  | 0.643896329  | -0.491563311 | Yes |
| 973  | 1.209368747  | 0.578242263  | No  |
| 974  | -0.418554741 | -0.35130201  | Yes |
| 975  | 0.266754247  | -0.380030137 | Yes |
| 976  | 0.021267253  | -0.525944155 | Yes |
| 977  | 0.57889003   | -0.42071234  | Yes |
| 978  | 0.885413396  | -0.144591999 | No  |
| 980  | -0.769685405 | -0.09675041  | Yes |
| 981  | -0.487352246 | 0.082138959  | Yes |
| 982  | 0.258268636  | 0.560114645  | Yes |
| 983  | -1.146827488 | 0.014782764  | Yes |
| 984  | -1.426282315 | 0.05832638   | Yes |
| 986  | -0.479395832 | -0.250337102 | Yes |
| 987  | 0.885947731  | 0.093514502  | No  |
| 988  | -1.146827488 | 0.014782764  | Yes |
| 989  | 0.610686177  | 0.113243998  | Yes |
| 990  | -1.119224614 | 0.572553221  | Yes |
| 991  | -0.839769787 | 0.529009606  | Yes |
| 992  | -0.769685405 | -0.09675041  | Yes |
| 993  | 0.570933616  | -0.088236279 | Yes |
| 994  | -1.426282315 | 0.05832638   | Yes |
| 996  | 1.561786287  | 0.131371616  | No  |
| 997  | 1.254728587  | -0.382855226 | No  |
| 999  | -0.478411011 | 0.623222439  | Yes |
| 1000 | 0.225380894  | 0.449648585  | Yes |
| 1001 | 1.200427511  | 0.037158782  | No  |

|      |              |              |     |
|------|--------------|--------------|-----|
| 1002 | 0.2409205    | -0.283945816 | Yes |
| 1003 | 0.249327401  | 0.019031164  | Yes |
| 1004 | -0.162839635 | 0.143376442  | Yes |
| 1005 | -1.049140232 | -0.053206794 | Yes |
| 1006 | -0.101268928 | 0.511689265  | Yes |
| 1007 | -0.101268928 | 0.511689265  | Yes |
| 1009 | -1.426282315 | 0.05832638   | Yes |
| 1013 | 1.246772172  | -0.050379165 | No  |
| 1014 | -1.426282315 | 0.05832638   | Yes |
| 1017 | 0.303628476  | -0.400982844 | Yes |
| 1018 | -0.024520148 | -1.100002986 | Yes |
| 1019 | 0.516655288  | 1.169621434  | No  |
| 1020 | -0.101696489 | -1.023467053 | Yes |
| 1021 | 0.828013037  | 0.362984337  | No  |
| 1022 | -0.725719216 | 0.431520967  | Yes |
| 1023 | 1.561786287  | 0.131371616  | No  |
| 1024 | 0.651852744  | -0.824039371 | Yes |
| 1025 | 1.561786287  | 0.131371616  | No  |
| 1026 | 0.967317345  | -0.00683555  | No  |
| 1027 | 1.561786287  | 0.131371616  | No  |
| 1028 | -0.119430707 | 1.333244596  | Yes |
| 1029 | -0.201334656 | 1.195488148  | Yes |
| 1030 | -0.754079771 | -0.541599165 | Yes |
| 1031 | 0.925700292  | 0.294994779  | No  |
| 1032 | -0.024520148 | -1.100002986 | Yes |
| 1033 | -0.101268928 | 0.511689265  | Yes |
| 1034 | 1.200427511  | 0.037158782  | No  |
| 1036 | -0.069879988 | -0.138905497 | Yes |
| 1037 | -0.376937688 | -0.653132339 | Yes |
| 1038 | 1.246214912  | 0.611217613  | No  |
| 1039 | 0.239151373  | -0.937800594 | Yes |
| 1040 | 0.151640146  | 0.087020723  | Yes |
| 1041 | 1.561786287  | 0.131371616  | No  |
| 1042 | 0.894354632  | 0.396491482  | No  |
| 1043 | -0.708292371 | 0.032459666  | Yes |
| 1044 | -1.426282315 | 0.05832638   | Yes |
| 1045 | -1.426282315 | 0.05832638   | Yes |
| 1046 | -1.426282315 | 0.05832638   | Yes |
| 1048 | -0.101696489 | -1.023467053 | Yes |
| 1050 | 1.561786287  | 0.131371616  | No  |
| 1051 | -0.154989995 | 1.1079502    | Yes |
| 1052 | -1.119224614 | 0.572553221  | Yes |
| 1053 | 0.958910444  | -0.30981253  | No  |
| 1054 | -0.443279283 | -0.686639483 | Yes |
