# Supplementary material for: Feature Signature Discovery for Autism Detection: An Automated Machine Learning Based Feature Ranking Framework
Source: Hindawi journal article supplement (doi:10.1155/2023/6330002), 2023-01-01
Supplement: f1 [file 6330002.f1.zip]

| Sample   | X            | Y            | Label |
|----------|--------------|--------------|-------|
| sample0  | 0.444219303  | 0.43251154   | NO    |
| sample1  | 0.444219303  | 0.43251154   | NO    |
| sample2  | 0.50027784   | 0.018204005  | NO    |
| sample3  | 0.821667999  | 0.525655172  | NO    |
| sample4  | -1.154719744 | -0.08330939  | YES   |
| sample5  | 0.30374439   | -0.039406728 | NO    |
| sample6  | -0.409163279 | 0.268549572  | YES   |
| sample7  | -0.464760327 | 0.084674936  | YES   |
| sample8  | -0.078139535 | 0.289503931  | YES   |
| sample9  | 0.31495048   | -0.682120517 | NO    |
| sample10 | -0.244331101 | -0.928828318 | YES   |
| sample11 | 1.199236417  | 0.320997665  | NO    |
| sample12 | -0.908684203 | -0.158802842 | YES   |
| sample13 | 1.4205739    | -0.468269    | NO    |
| sample14 | -1.154719744 | -0.08330939  | YES   |
| sample15 | -1.154719744 | -0.08330939  | YES   |
| sample16 | -1.000021907 | 0.62340165   | YES   |
| sample17 | 1.666609441  | -0.543762452 | NO    |
| sample18 | -0.621044477 | -0.77461139  | YES   |
| sample19 | -0.565270128 | 0.755194065  | YES   |
| sample20 | -0.512891314 | 0.157711516  | YES   |
| sample21 | -0.131915506 | 0.389859121  | NO    |
| sample22 | 0.95229276   | 0.957549381  | NO    |
| sample23 | 0.008669746  | 0.670181569  | NO    |
| sample24 | -0.843915058 | 0.136757157  | YES   |
| sample25 | -0.119801299 | -0.813912931 | NO    |
| sample26 | 0.009577862  | 0.109123304  | NO    |
| sample27 | -1.154719744 | -0.08330939  | YES   |
| sample28 | 0.581264496  | -0.171727278 | NO    |
| sample29 | 1.1684434    | -0.70975437  | NO    |
| sample30 | -1.154719744 | -0.08330939  | YES   |
| sample31 | 0.466369777  | 0.326033357  | NO    |
| sample32 | -0.500446854 | -0.403961964 | YES   |
| sample33 | 0.345118515  | -0.090324864 | NO    |
| sample34 | 0.296987528  | -0.017288283 | NO    |
| sample35 | 1.665200428  | 0.649593081  | NO    |
| sample36 | 1.067823262  | 0.15236058   | NO    |
| sample37 | 1.419164887  | 0.725086532  | NO    |
| sample38 | -1.154719744 | -0.08330939  | YES   |
| sample39 | -0.473932424 | -0.027010427 | YES   |
| sample40 | -0.163127738 | 0.19305612   | NO    |
| sample41 | 1.665200428  | 0.649593081  | NO    |
| sample42 | 0.954609888  | -0.796864416 | NO    |
| sample43 | -0.843915058 | 0.136757157  | YES   |
| sample44 | 1.199737313  | -0.311299603 | NO    |
| sample45 | 0.534258333  | 0.652066759  | NO    |

|          |              |              |     |
|----------|--------------|--------------|-----|
| sample46 | 0.78946597   | 0.68825867   | NO  |
| sample47 | 0.124472581  | -0.388637331 | YES |
| sample48 | -0.457294265 | 0.341586153  | YES |
| sample49 | 1.454444054  | 0.357189575  | NO  |
| sample50 | 1.04453858   | -0.385713375 | NO  |
| sample51 | 0.100915566  | -0.673081188 | NO  |
| sample52 | -0.345749018 | 0.302749076  | NO  |
| sample53 | -0.768098951 | 0.121519605  | YES |
| sample54 | 0.188213888  | 0.765782073  | NO  |
| sample55 | 1.323141237  | -0.00304333  | NO  |
| sample56 | 1.156329193  | 0.494017683  | NO  |
| sample57 | -0.998612895 | -0.569953882 | YES |
| sample58 | -0.743405257 | -0.533761972 | YES |
| sample59 | -0.457294265 | 0.341586153  | YES |
| sample60 | 1.077105696  | 0.072450122  | NO  |
| sample61 | -0.998612895 | -0.569953882 | YES |
| sample62 | 0.288222792  | 0.727560211  | NO  |
| sample63 | -0.687847616 | -0.315772238 | YES |
| sample64 | 0.179161513  | 0.35629557   | NO  |
| sample65 | 1.533897611  | 0.289360175  | NO  |
| sample66 | 1.109307725  | -0.090153376 | NO  |
| sample67 | 0.954609888  | -0.796864416 | NO  |
| sample68 | 0.356123203  | -0.636889277 | NO  |
| sample69 | -0.998612895 | -0.569953882 | YES |
| sample70 | 0.667200222  | -0.670452829 | NO  |
| sample71 | 1.04453858   | -0.385713375 | NO  |
| sample72 | -0.409163279 | 0.268549572  | YES |
| sample73 | -0.843915058 | 0.136757157  | YES |
| sample74 | -0.457294265 | 0.341586153  | YES |
| sample75 | -0.20996005  | -0.73566701  | NO  |
| sample76 | -0.94396337  | 0.209094116  | YES |
| sample77 | 0.954609888  | -0.796864416 | NO  |
| sample78 | -0.768098951 | 0.121519605  | YES |
| sample79 | -0.288022355 | 0.876503614  | NO  |
| sample80 | 0.730831191  | 0.675562396  | NO  |
| sample81 | -0.908684203 | -0.158802842 | YES |
| sample82 | -0.563861116 | -0.438161468 | YES |
| sample83 | 0.534258333  | 0.652066759  | NO  |
| sample84 | 0.100915566  | -0.673081188 | NO  |
| sample85 | -0.768098951 | 0.121519605  | YES |
| sample86 | -0.179774159 | 0.209265603  | YES |
| sample87 | -1.154719744 | -0.08330939  | YES |
| sample88 | 0.287314676  | 1.288618476  | NO  |
| sample89 | -0.908684203 | -0.158802842 | YES |
| sample90 | -0.611992102 | -0.365124887 | YES |
| sample91 | 0.36537698   | -0.323552149 | NO  |
| sample92 | -0.752577354 | -0.645447334 | YES |

|           |              |              |     |
|-----------|--------------|--------------|-----|
| sample93  | -0.752577354 | -0.645447334 | YES |
| sample94  | -1.154719744 | -0.08330939  | YES |
| sample95  | -0.096988988 | -0.670624316 | YES |
| sample96  | -0.565270128 | 0.755194065  | YES |
| sample97  | -0.390530533 | -0.083137902 | YES |
| sample98  | -0.301226824 | -0.110943243 | YES |
| sample99  | 1.067025484  | 0.521823024  | NO  |
| sample100 | -0.014725274 | 0.323703434  | NO  |
| sample101 | -0.122590798 | 0.545715525  | YES |
| sample102 | 1.231857662  | -0.675554866 | NO  |
| sample103 | 0.130800466  | 0.918729112  | NO  |
| sample104 | 0.823077011  | -0.66770036  | NO  |
| sample105 | -0.565270128 | 0.755194065  | YES |
| sample106 | -0.613401115 | 0.828230645  | YES |
| sample107 | 1.109307725  | -0.090153376 | NO  |
| sample108 | 0.746313381  | -0.057289447 | NO  |
| sample109 | 1.0679336    | -0.039235241 | NO  |
| sample110 | -0.096364006 | -0.231667935 | YES |
| sample111 | 1.16395725   | 0.688894622  | NO  |
| sample112 | -0.597879517 | 0.061263706  | YES |
| sample113 | -0.899512106 | -0.047117479 | YES |
| sample114 | 0.057708849  | 0.036086723  | NO  |
| sample115 | -1.154719744 | -0.08330939  | YES |
| sample116 | -0.768098951 | 0.121519605  | YES |
| sample117 | -0.115235074 | 0.994222563  | NO  |
| sample118 | -0.20996005  | -0.73566701  | NO  |
| sample119 | 0.911826751  | 0.447409252  | NO  |
| sample120 | -0.543229992 | 0.840311703  | YES |
| sample121 | 0.090955075  | -0.521509426 | NO  |
| sample122 | -1.154719744 | -0.08330939  | YES |
| sample123 | 0.458903715  | 0.06912214   | NO  |
| sample124 | -0.477091242 | -0.023368733 | YES |
| sample125 | -0.441812075 | -0.39126569  | YES |
| sample126 | -0.354513754 | 1.04759757   | YES |
| sample127 | -0.285705226 | -0.877910183 | YES |
| sample128 | 0.158218649  | -0.634432406 | NO  |
| sample129 | -0.353104741 | -0.145757962 | YES |
| sample130 | -0.768098951 | 0.121519605  | YES |
| sample131 | 1.009259413  | -0.017816418 | NO  |
| sample132 | 0.067386205  | 0.884529608  | NO  |
| sample133 | 0.441795805  | 0.683513794  | NO  |
| sample134 | -1.000021907 | 0.62340165   | YES |
| sample135 | 0.265410481  | 0.584271596  | NO  |
| sample136 | 0.076341594  | -0.315600751 | YES |
| sample137 | 1.821307277  | 0.162948588  | NO  |
| sample138 | 0.248147341  | -0.223281365 | NO  |
| sample139 | -1.154719744 | -0.08330939  | YES |

|           |              |              |     |
|-----------|--------------|--------------|-----|
| sample140 | -0.621044477 | -0.77461139  | YES |
| sample141 | 0.203696078  | 0.03293023   | NO  |
| sample142 | -0.409163279 | 0.268549572  | YES |
| sample143 | -0.353104741 | -0.145757962 | YES |
| sample144 | 0.209270131  | 0.163092344  | NO  |
| sample145 | -0.768098951 | 0.121519605  | YES |
| sample146 | 0.757128914  | -0.259301788 | NO  |
| sample147 | -0.768098951 | 0.121519605  | YES |
| sample148 | -0.131007389 | -0.171199143 | NO  |
| sample149 | 1.078284649  | -0.631508449 | NO  |
| sample150 | -0.178649336 | 0.96002306   | YES |
| sample151 | -0.37704293  | -0.095705691 | YES |
| sample152 | 0.146512717  | -0.303519693 | NO  |
| sample153 | -0.768098951 | 0.121519605  | YES |
| sample154 | -0.390530533 | -0.083137902 | YES |
| sample155 | -0.719967965 | 0.048483025  | YES |
| sample156 | 0.056353965  | -0.225273772 | NO  |
| sample157 | -0.40043795  | -0.442183825 | YES |
| sample158 | -0.234653744 | -0.080385433 | YES |
| sample159 | -1.154719744 | -0.08330939  | YES |
| sample160 | -0.409163279 | 0.268549572  | YES |
| sample161 | -0.244331101 | -0.928828318 | YES |
| sample162 | 1.032424373  | 0.818058678  | NO  |
| sample163 | -0.324582436 | -0.491536474 | YES |
| sample164 | 0.746423719  | -0.248885268 | NO  |
| sample165 | 0.577041471  | -0.592206908 | NO  |
| sample166 | 0.814024637  | -1.077186863 | NO  |
| sample167 | -0.563861116 | -0.438161468 | YES |
| sample168 | -0.753986366 | 0.547908198  | YES |
| sample169 | -0.998612895 | -0.569953882 | YES |
| sample170 | 0.76630101   | -0.147616426 | NO  |
| sample171 | 0.913235763  | -0.745946281 | NO  |
| sample172 | -1.154719744 | -0.08330939  | YES |
| sample173 | 0.223493054  | 0.397885116  | NO  |
| sample174 | 0.458903715  | 0.06912214   | NO  |
| sample175 | 0.699537278  | 0.277107629  | NO  |
| sample176 | 0.610233569  | 0.30491297   | NO  |
| sample177 | -1.154719744 | -0.08330939  | YES |
| sample178 | 0.286907316  | 0.432084619  | NO  |
| sample179 | -0.285705226 | -0.877910183 | YES |
| sample180 | -0.613401115 | 0.828230645  | YES |
| sample181 | 1.012336551  | -0.223109877 | NO  |
| sample182 | -0.711203228 | -0.696365469 | YES |
| sample183 | 0.278142579  | 1.176933113  | NO  |
| sample184 | -0.409163279 | 0.268549572  | YES |
| sample185 | 0.232448443  | -0.802245243 | NO  |
| sample186 | -0.310279198 | -0.520429746 | YES |

|           |              |              |     |
|-----------|--------------|--------------|-----|
| sample187 | -1.154719744 | -0.08330939  | YES |
| sample188 | -0.062617937 | -0.477463009 | NO  |
| sample189 | -0.777151326 | -0.287966897 | YES |
| sample190 | -0.098398    | 0.522731216  | YES |
| sample191 | -0.045937506 | 0.126900433  | YES |
| sample192 | -0.146528987 | 0.595767797  | YES |
| sample193 | 0.110087663  | -0.561395825 | NO  |
| sample194 | 0.676142259  | -0.069370505 | NO  |
| sample195 | 1.131755221  | 0.851498119  | NO  |
| sample196 | -0.613401115 | 0.828230645  | YES |
| sample197 | -0.285705226 | -0.877910183 | YES |
| sample198 | -0.908684203 | -0.158802842 | YES |
| sample199 | 0.954609888  | -0.796864416 | NO  |
| sample200 | 0.954609888  | -0.796864416 | NO  |
| sample201 | -0.512891314 | 0.157711516  | YES |
| sample202 | 0.913235763  | -0.745946281 | NO  |
| sample203 | -0.178649336 | 0.96002306   | YES |
| sample204 | -0.621044477 | -0.77461139  | YES |
| sample205 | 0.287314676  | 1.288618476  | NO  |
| sample206 | -0.74481427  | 0.659593561  | YES |
| sample207 | -0.94396337  | 0.209094116  | YES |
| sample208 | 1.109307725  | -0.090153376 | NO  |
| sample209 | -0.153955642 | 0.304741483  | NO  |
| sample210 | -0.409163279 | 0.268549572  | YES |
| sample211 | 0.232448443  | -0.802245243 | NO  |
| sample212 | 0.534258333  | 0.652066759  | NO  |
| sample213 | 0.100915566  | -0.673081188 | NO  |
| sample214 | -0.377951047 | 0.465352573  | NO  |
| sample215 | -1.154719744 | -0.08330939  | YES |
| sample216 | -0.743405257 | -0.533761972 | YES |
| sample217 | 1.56609964   | 0.126756677  | NO  |
| sample218 | 0.944447995  | -0.549143279 | NO  |
| sample219 | -0.998612895 | -0.569953882 | YES |
| sample220 | -1.154719744 | -0.08330939  | YES |
| sample221 | -0.333347172 | 0.25331202   | YES |
| sample222 | -0.08719191  | -0.119982572 | YES |
| sample223 | -0.613401115 | 0.828230645  | YES |
| sample224 | 0.610233569  | 0.30491297   | NO  |
| sample225 | -1.154719744 | -0.08330939  | YES |
| sample226 | 0.591154056  | -0.165818315 | NO  |
| sample227 | -0.285705226 | -0.877910183 | YES |
| sample228 | 0.823196733  | -0.9655015   | NO  |
| sample229 | -0.789265533 | 0.915805155  | YES |
| sample230 | -0.711203228 | -0.696365469 | YES |
| sample231 | 0.59031687   | 0.237759225  | NO  |
| sample232 | -0.087311631 | 0.177818568  | YES |
| sample233 | -0.753986366 | 0.547908198  | YES |

|           |              |              |     |
|-----------|--------------|--------------|-----|
| sample234 | 0.634768133  | -0.01845237  | NO  |
| sample235 | -0.163127738 | 0.19305612   | NO  |
| sample236 | -0.768098951 | 0.121519605  | YES |
| sample237 | 0.310262928  | 0.81267785   | NO  |
| sample238 | -0.09054138  | 0.338940986  | NO  |
| sample239 | 0.26486718   | 0.34696698   | NO  |
| sample240 | 0.075433478  | 0.245457514  | NO  |
| sample241 | 0.289631804  | -0.465795321 | NO  |
| sample242 | 1.255294954  | -0.09330987  | NO  |
| sample243 | 1.264467051  | 0.018375493  | NO  |
| sample244 | 0.14763754   | 0.447237764  | NO  |
| sample245 | 0.112358374  | 0.815134721  | NO  |
| sample246 | 0.920998847  | 0.559094614  | NO  |
| sample247 | 1.666609441  | -0.543762452 | NO  |
| sample248 | 1.123992137  | -0.453542775 | NO  |
| sample249 | 0.19104566   | -0.358079522 | NO  |
| sample250 | -0.186522758 | -0.153422014 | YES |
| sample251 | -0.473932424 | -0.027010427 | YES |
| sample252 | -0.096988988 | -0.670624316 | YES |
| sample253 | -0.563861116 | -0.438161468 | YES |
| sample254 | 0.498979166  | 1.019963716  | NO  |
| sample255 | 0.543430429  | 0.763752122  | NO  |
| sample256 | 0.510902721  | 0.271473529  | NO  |
| sample257 | -1.154719744 | -0.08330939  | YES |
| sample258 | 0.954609888  | -0.796864416 | NO  |
| sample259 | -0.563861116 | -0.438161468 | YES |
| sample260 | 0.032107038  | 1.252426565  | NO  |
| sample261 | 0.667089884  | -0.478857008 | NO  |
| sample262 | -1.154719744 | -0.08330939  | YES |
| sample263 | 0.155565091  | 0.10596681   | NO  |
| sample264 | -0.611992102 | -0.365124887 | YES |
| sample265 | -0.789265533 | 0.915805155  | YES |
| sample266 | 0.575632458  | 0.601148624  | NO  |
| sample267 | -0.998612895 | -0.569953882 | YES |
| sample268 | -0.145119975 | -0.597587736 | YES |
| sample269 | 0.746543441  | -0.546686408 | NO  |
| sample270 | -0.319234587 | 0.679700613  | YES |
| sample271 | 0.853110291  | 0.233061212  | NO  |
| sample272 | 0.944447995  | -0.549143279 | NO  |
| sample273 | -0.777151326 | -0.287966897 | YES |
| sample274 | -0.768098951 | 0.121519605  | YES |
| sample275 | 0.386238164  | 0.465524061  | NO  |
| sample276 | 0.149046553  | -0.746117768 | NO  |
| sample277 | -0.146528987 | 0.595767797  | YES |
| sample278 | 0.722686933  | -0.294982371 | NO  |
| sample279 | -0.899512106 | -0.047117479 | YES |
| sample280 | 1.278689974  | 0.253168264  | NO  |

|           |              |              |     |
|-----------|--------------|--------------|-----|
| sample281 | 0.067386205  | 0.884529608  | NO  |
| sample282 | -0.076357865 | 0.607848855  | NO  |
| sample283 | 0.64353287   | -0.763300864 | NO  |
| sample284 | 0.289631804  | -0.465795321 | NO  |
| sample285 | -0.621274537 | -0.285214429 | YES |
| sample286 | -0.908684203 | -0.158802842 | YES |
| sample287 | -1.154719744 | -0.08330939  | YES |
| sample288 | 0.954609888  | -0.796864416 | NO  |
| sample289 | -0.177240323 | -0.233332472 | YES |
| sample290 | -0.687847616 | -0.315772238 | YES |
| sample291 | 1.1684434    | -0.70975437  | NO  |
